# Supplementary material for: Whole Genome Sequencing Analysis of Spike D614G Mutation Reveals Unique SARS-CoV-2 Lineages of B.1.524 and AU.2 in Malaysia
Source: bioRxiv or medRxiv preprint supplement (doi:10.1101/2021.08.11.21261902), 2021-08-18
Supplement: Supplementary file [file media-1.pdf]

**A. D614G variant lineage distribution in 2020**

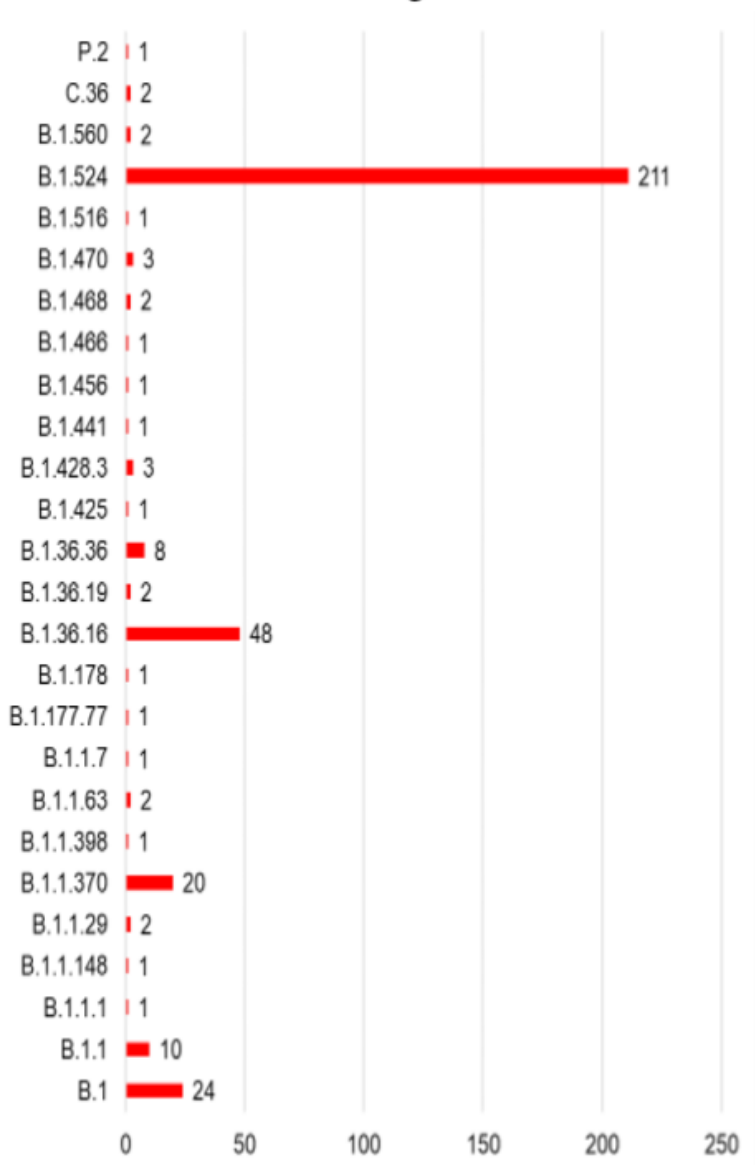

**B. D614G variant lineage distribution in 2021**

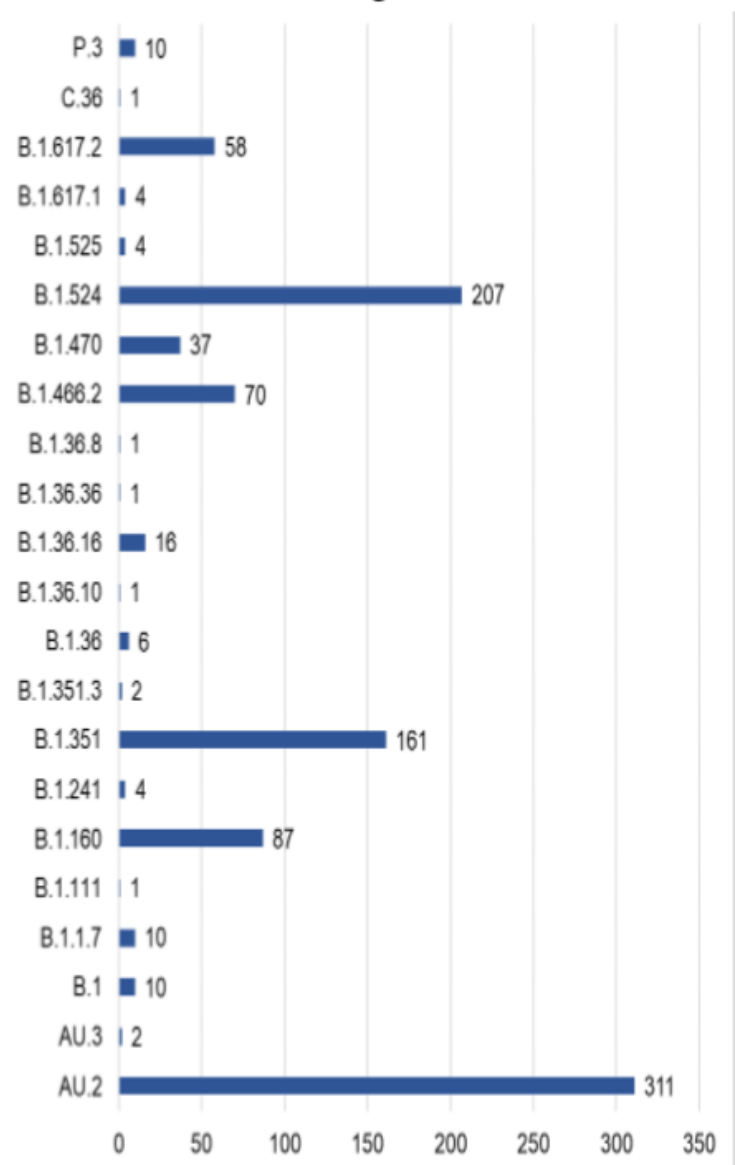

**S3 Fig 1. D614G variant lineage distribution in 2020 and 2021 based on complete genomes deposited to GISAID (Malaysia). A. The distribution of lineages from March to December, 2020. B. The distribution of lineages from January to July, 2020**
