# Supplementary material for: Whole Genome Sequencing Analysis of Spike D614G Mutation Reveals Unique SARS-CoV-2 Lineages of B.1.524 and AU.2 in Malaysia
Source: bioRxiv or medRxiv preprint supplement (doi:10.1101/2021.08.11.21261902), 2021-08-18
Supplement: Supplementary file [file media-2.pdf]

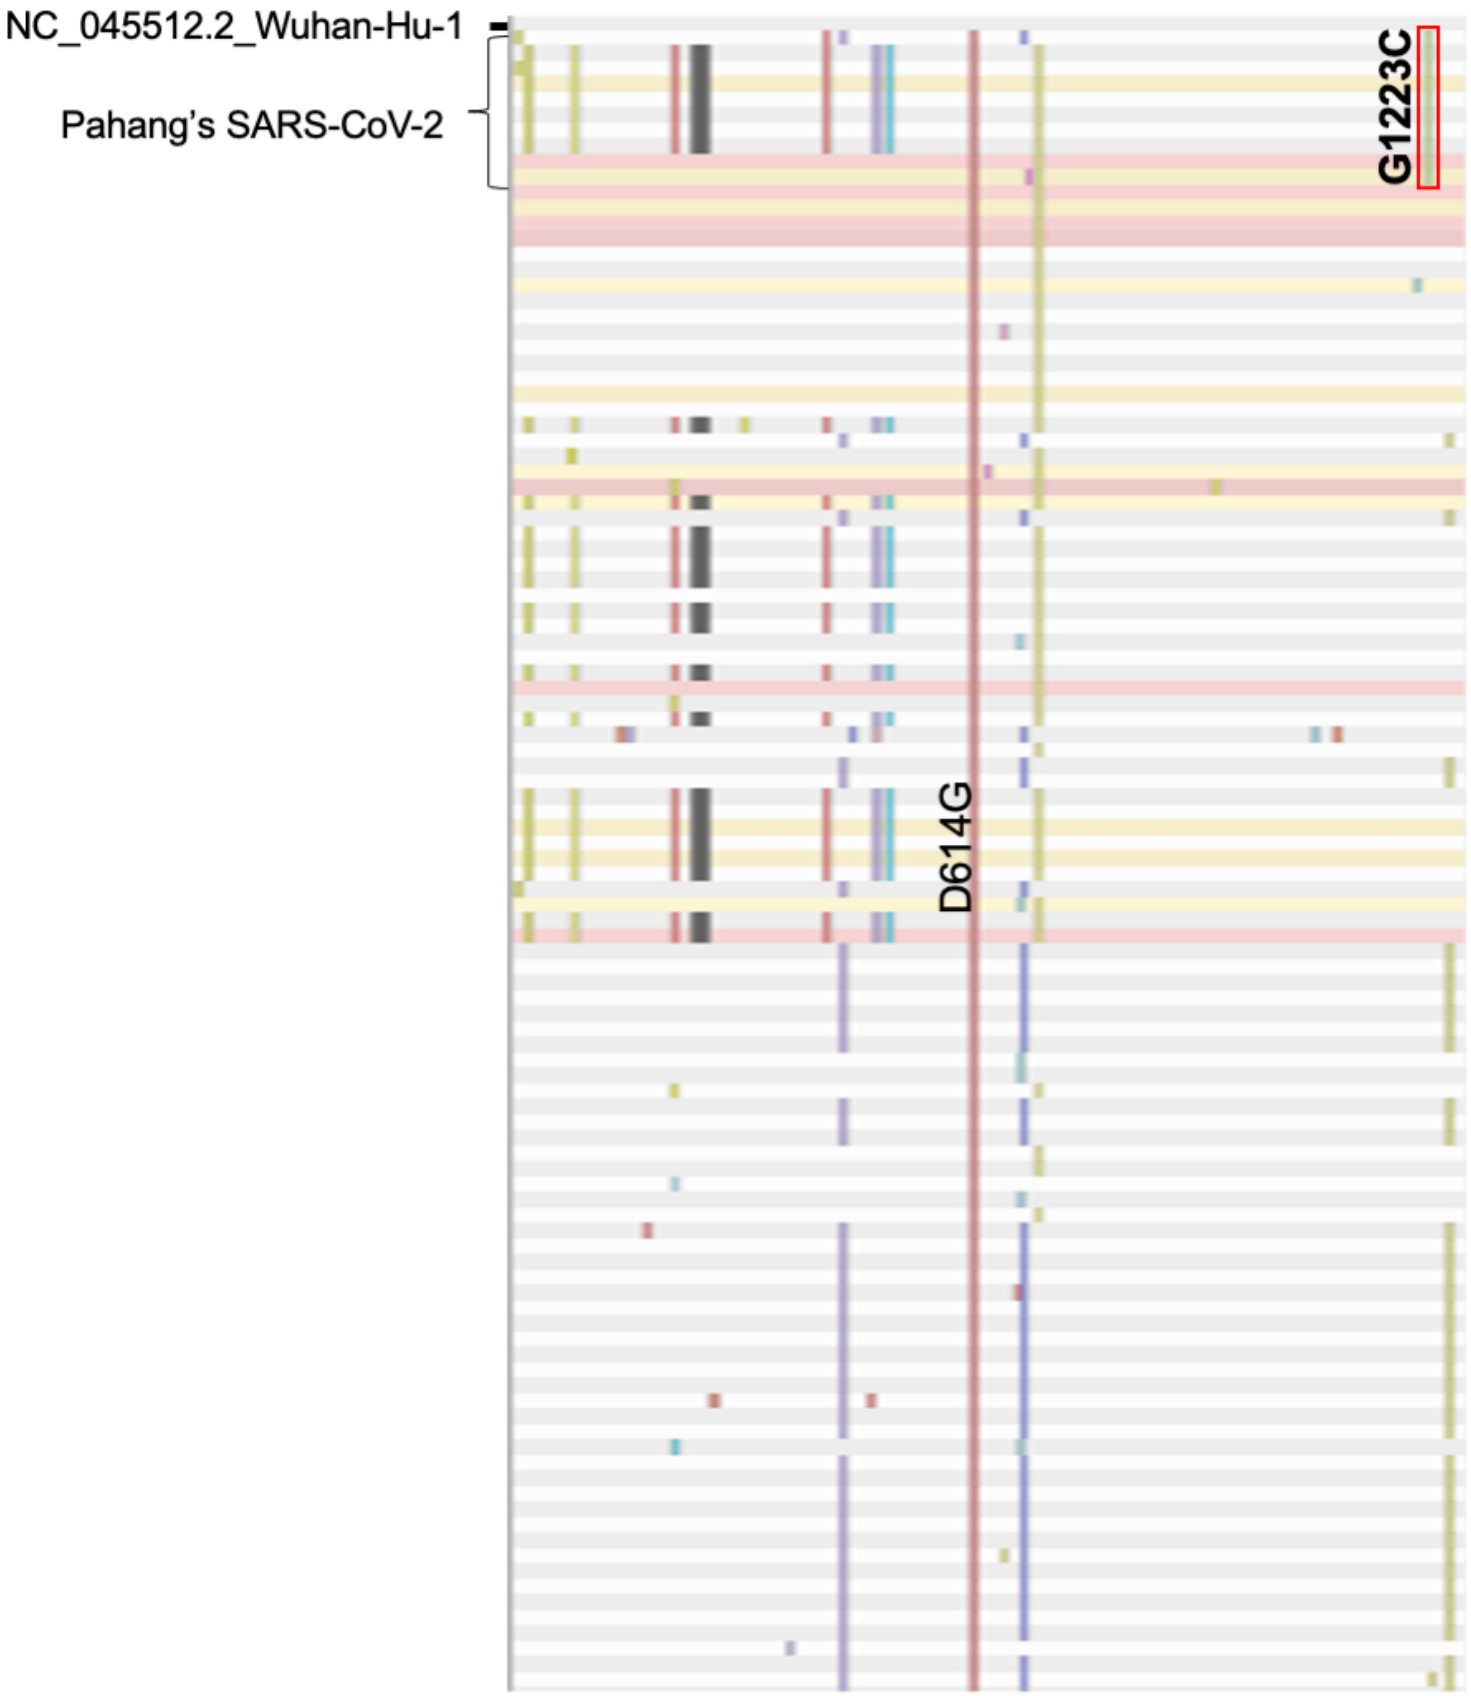

**S4 Fig. 2: Point of mutations in Spike protein of Pahang SARS-CoV-2,D614G variant compared to other genomes in Malaysia. The screen shot image presented here represent some of the genomes analysed using Nexclade v.1.5.2 (<https://clades.nextstrain.org>).**
